# Supplementary material
Source: publisher site journal article supplement (https://www.dovepress.com/article/464044)
Supplement: Supplementary file 1 [file get_supplementary_file.php]

**Supplemental Material**

**Supplementary Table 1.** Charlson Co-morbidity Index

| **All Charlson conditions** | **Weights** |
| --- | --- |
| Myocardial infarction | 1 |
| Congestive heart failure | 1 |
| Peripheral vascular disease | 1 |
| Cerebral vascular accident | 1 |
| Dementia | 1 |
| Chronic pulmonary disease | 1 |
| Connective tissue disease | 1 |
| Ulcer disease | 1 |
| Mild liver disease | 1 |
| Diabetes mellitus | 1 |
| Diabetes mellitus with chronic complications | 2 |
| Hemiplegia, paraplegia | 2 |
| Moderate/severe renal disease | 2 |
| Any tumor | 2 |
| Leukemia | 2 |
| Lymphoma | 2 |
| Metastatic solid tumor | 3 |
| Moderate/severe liver disease | 3 |
| AIDS | 6 |

Note: Data from Charlson et al.7

Abbreviations: AIDS=Acquired Immune Deficiency Syndrome.

**Supplementary Table 2.** Evaluation of frailty by Edmonton frailty score (EFS)

| **Frailty domain** | **Item** | **0 point** | **1 point** | **2 points** |
| --- | --- | --- | --- | --- |
| Cognition | Please imagine that this pre-drawn circle is a clock. I would like you to place the numbers in the correct positions then place the hands to indicate a time of ‘ten after eleven’ | No errors | Minor spacing errors | Other errors |
| General health status | In the past year, how many times have you been admitted to a hospital? | 0 | 1-2 | ≥2 |
| In general, how would you describe your health? | Excellent | Fair | Poor |
| Functional independence | With how many of the following activities do you require help? (meal preparation, shopping, transportation, telephone, housekeeping, laundry, managing money, taking medications) | 0-1 | 2-4 | 5-8 |
| Social support | When you need help, can you count on someone who is willing and able to meet your needs? | Always | Sometimes | Never |
| Medication use | Do you use five or more diffrent prescription medications on a regular basis? | No | Yes |  |
| At times, do you forget to take your prescription medications? | No | Yes |  |
| Nutrition | Have you recently lost weight such that your clothing has become looser? | No | Yes |  |
| Mood | Do you often feel sad or depressed？ | No | Yes |  |
| Continence | Do you have a problem with losing control of urine when you don’t want to? | No | Yes |  |
| Functional performance | I would like you to sit in this chair with you back and arms resting. Then, when I say ‘Go’, please stand up and walk at a safe and comfortable pace to the mark on the floor (approximately 3m away), return to the chair and sit down | 0-10 s | 11-20 s | One of:>20 s, or patient unwilling or requires assistance |

**Note:** The Edmonton Frail Scale – Acute Care © 2020 was created by Dr. Darryl Rolfson and used here under license from the University of Alberta. Based on the original Edmonton Frail Scale – Bedside Version presented at the Canadian Geriatric Society Annual Scientific Meeting, later published in abbreviated format in Rolfson DB et al., Validity and reliability of the Edmonton Frail Scale, Age and Ageing 2006; 35(5):526-529. doi:10.1093/ageing/afl041. Creative Commons CC-BY-NC-ND.

**Supplementary Table 3 .** The short form mini nutritional assessment (MNA-SF)


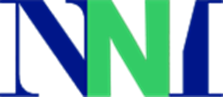

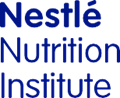
 **MNA®**

Mini Nutritional Assessment


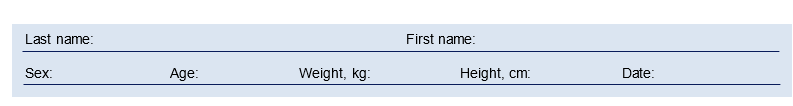


Complete the screen by filling in the boxes with the appropriate numbers. Total the numbers for the final screening score.

Screening

**A Has food intake declined over the past 3 months due to loss of appetite, digestive problems, chewing or**

**swallowing difficulties?**

0 = severe decrease in food intake

1 = moderate decrease in food intake

2 = no decrease in food intake

**B Weight loss during the last 3 months**

0 = weight loss greater than 3 kg (6.6 lbs)

1 = does not know

2 = weight loss between 1 and 3 kg (2.2 and 6.6 lbs)

3 = no weight loss

**C Mobility**

0 = bed or chair bound

1 = able to get out of bed / chair but does not go out

2 = goes out

**D Has suffered psychological stress or acute disease in the past 3 months?**

0 = yes 2 = no

**E Neuropsychological problems**

0 = severe dementia or depression

1 = mild dementia

2 = no psychological problems

**F1 Body Mass Index (BMI) (weight in kg) / (height in m)2**

0 = BMI less than 19

1 = BMI 19 to less than 21

2 = BMI 21 to less than 23

3 = BMI 23 or greater

IF BMI IS NOT AVAILABLE, REPLACE QUESTION F1 WITH QUESTION F2.

DO NOT ANSWER QUESTION F2 IF QUESTION F1 IS ALREADY COMPLETED.

**F2 Calf circumference (CC) in cm**

0 = CC less than 31

3 = CC 31 or greater

Screening score (max. 14 points)

**12 - 14 points:** Normal nutritional status

**8 - 11 points:** At risk of malnutrition

**0 - 7 points:** Malnourished

**References**

1. Vellas B, Villars H, Abellan G, *et al.* Overview of the MNA® - Its History and Challenges. *J Nutr Health Aging*. 2006;**10**:456-465.

2. Rubenstein LZ, Harker JO, Salva A, Guigoz Y, Vellas B. Screening for Undernutrition in Geriatric Practice: Developing the Short-Form Mini

Nutritional Assessment (MNA-SF). *J. Geront*. 2001; **56A**: M366-377

3. Guigoz Y. The Mini-Nutritional Assessment (MNA®) Review of the Literature - What does it tell us? *J Nutr Health Aging*. 2006; **10**:466-487.

4. Kaiser MJ, Bauer JM, Ramsch C, et al. Validation of the Mini Nutritional Assessment Short-Form (MNA®-SF): A practical tool for

identification of nutritional status. *J Nutr Health Aging.* 2009; **13**:782-788.

**Supplementary Table 4. The** clock drawing test (CDT)

| **Item** | **Score** | | |
| --- | --- | --- | --- |
| No errors | Partial errors | Complete errors |
| The circle represents the face of a clock. Please put in the numbers so that it looks like a clock. Then please add arms so that the clock indicates the time “ten minutes after eleven”. | 0 | 1 | 2 |
